# Supplementary material for: Understanding SEI evolution during the cycling test of anode-free lithium-metal batteries with LiDFOB salt
Source: Royal Society of Chemistry journal article supplement (doi:10.1039/d3ra03184e), 2023-01-01
Supplement: d3ra03184e1.pdf [file d3ra03184e1.pdf]

Supplementary Information

## **Understanding SEI evolutions during cycling test of anode-free lithium-metal batteries with LiDFOB salt**

Naufal Hanif Hawari,<sup>a,b</sup> Huiqing Xie,<sup>a</sup> Achmad Prayogi,<sup>b</sup> Afriyanti Sumboja,<sup>b,\*</sup> Ning Ding<sup>a,\*</sup>

<sup>a</sup> Institute of Materials Research and Engineering, A\*STAR (Agency for Science, Technology, and Research), 138634, Singapore;

<sup>b</sup> Material Science and Engineering Research Group, Faculty of Mechanical and Aerospace, Institut Teknologi Bandung, Jl. Ganesha 10, Bandung 40132, Indonesia;

\* Correspondences: [sumboja@itb.ac.id](mailto:sumboja@itb.ac.id) (A.S.), [dingni@imre.a-star.edu.sg](mailto:dingni@imre.a-star.edu.sg) (N.D.)

### S1. Plated lithium on Cu foil with different electrolyte

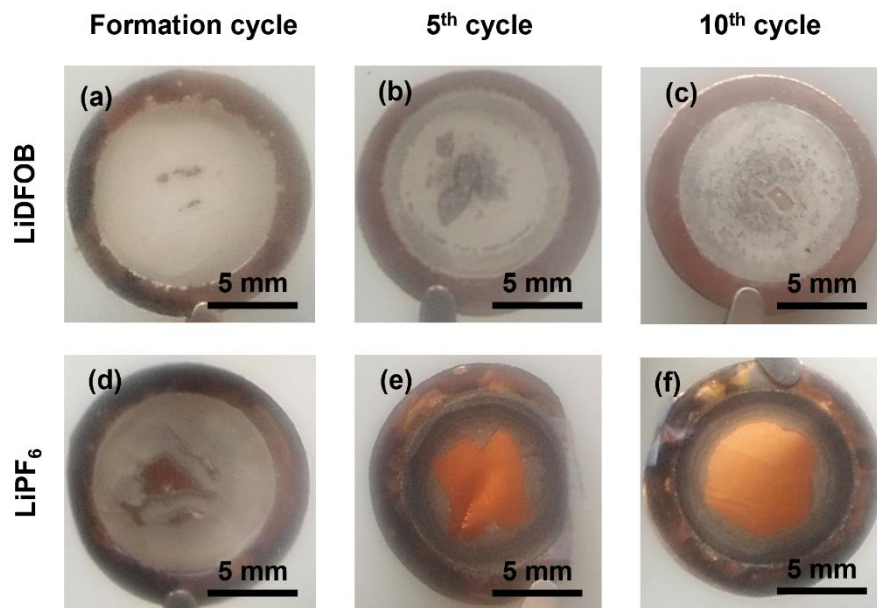

**Figure S1.** Plated Li metal on Cu foil after fully charging the NMC || Cu cells with the electrolyte comprised of 1M LiDFOB dissolved in EC:DEC (1:1, v/v) in the (a) formation cycle, (b) 5<sup>th</sup> cycle, (c) 10<sup>th</sup> cycle; and of 1M LiPF<sub>6</sub> in EC:DEC (1:1, v/v) in the (d) formation cycle, (e) 5<sup>th</sup> cycle, (f) 10<sup>th</sup> cycle.

## S2. Fitting procedure of EIS data

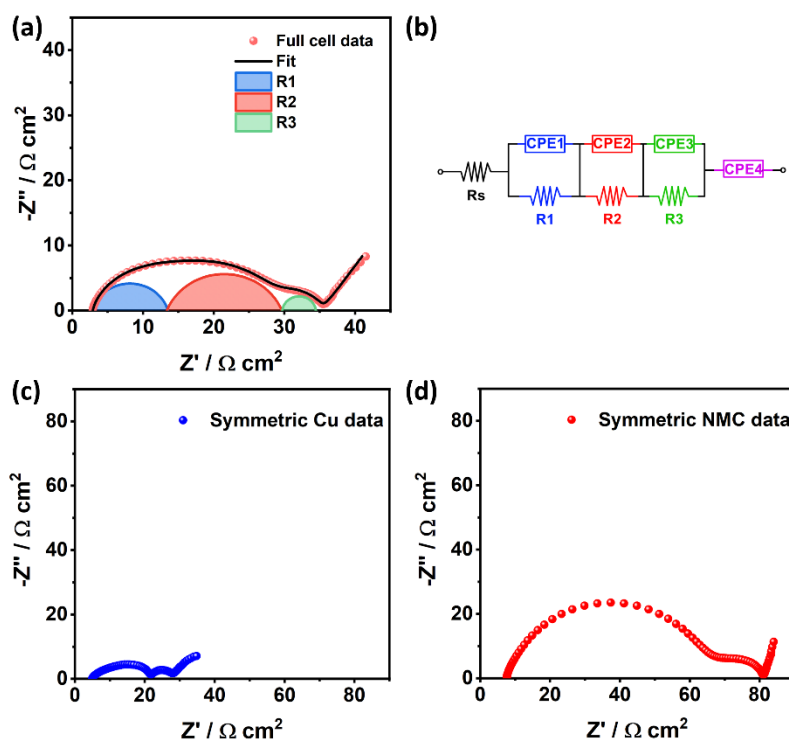

**Figure S2.** Nyquist plots of a fully charged NMC|Cu cell and the symmetric cells built from the electrodes retrieved from two NMC|Cu cells (1<sup>st</sup> charging after the formation cycle) with 1M LiDFOB electrolyte dissolved in EC:DEC (1:1, v/v). (a) impedance data fitting and (b) the equivalent circuit for fitting of the Nyquist plots of NMC|Cu cell. Representative's Nyquist plot of (c) Li plated Cu|Cu (i.e., anode) and (d) charged NMC|NMC (i.e., cathode) symmetric cell.  $R_s$ ,  $R_1$ ,  $R_2$ , and  $R_3$  represents the resistance from electrolyte ( $R_s$ ), SEI from anode ( $R_{SEI-anode}$ ), cathode interphase electrolyte ( $R_{CEI-cathode}$ ) and the charge transfer ( $R_{ct}$ ), respectively.

The intersection of  $R_s$  at  $Z'' = 0$  is mainly from the resistance of electrolyte solution (partially attributed by the electric contact). Three distinct semi-circles are observed in the resulted Nyquist plot. Thus, we fitted the plot using three  $R$ - $CPE$  circuits in series, followed by CPE as shown in **Figure S2b**. To better understand the cathode and anode contributions in the impedance spectra of AFLMBs, we used the electrodes obtained from two fully charged NMC|Cu cells and assembled the symmetric Li-Cu|Li-Cu (**Figure S2c**) and NMC|NMC cells (**Figure S2d**). The anode symmetric cell exhibits much smaller semicircles than the cathode symmetric cell. In comparison with the Nyquist plot of the full cell, the negative Li on Cu electrode contributes to high frequency (i.e., first semi-circles,  $R_1$ ) which has lower and more suppressed semicircle. On the other hand, the cathode side contributes to the medium

frequency (i.e., second semi-circle,  $R_2$ ) which has higher impedance value.  $R_3$ , at the low frequency, is from the charge transfer resistance, which varies with the electric field and cannot be deconvoluted based on the symmetric cell data.

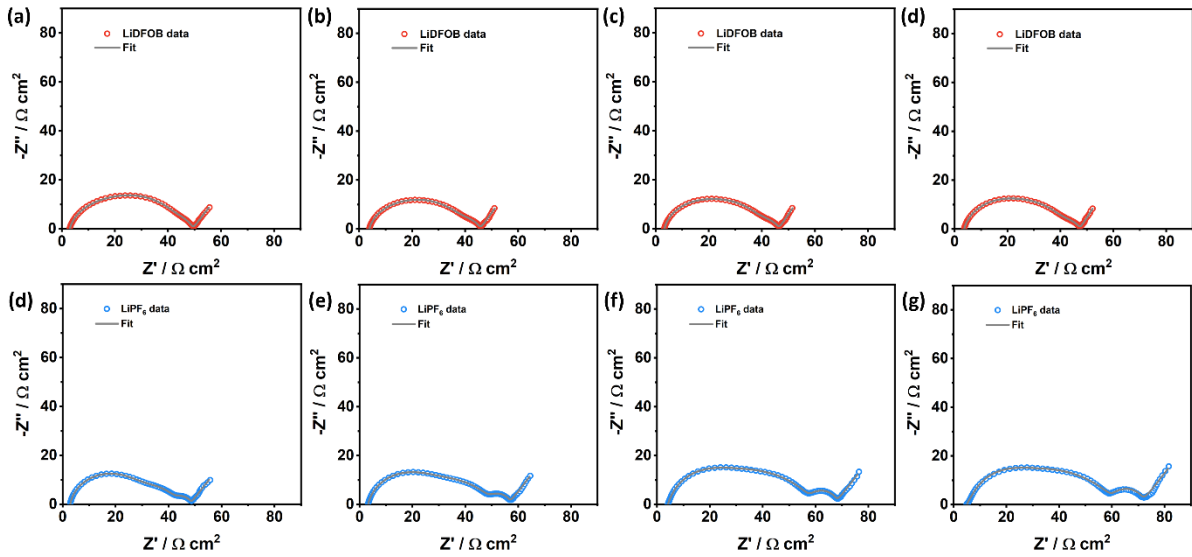

**Figure S3.** Fitted Nyquist plots of the fully charged NMC||Cu cells with (a-d) LiDFOB and (e-h) LiPF<sub>6</sub> electrolyte in the 1<sup>st</sup>, 5<sup>th</sup>, 10<sup>th</sup>, and 15<sup>th</sup> cycle.

### S3. Fitting parameters of EIS data

Table S1. Fitting parameters of NMC || Cu cells with LiPF<sub>6</sub> and LiDFOB electrolyte

| Parameters                           | Unit                                       | LiPF <sub>6</sub>     |                       |                        |                        | LiDFOB                |                       |                        |                        |
|--------------------------------------|--------------------------------------------|-----------------------|-----------------------|------------------------|------------------------|-----------------------|-----------------------|------------------------|------------------------|
|                                      |                                            | 1 <sup>st</sup> cycle | 5 <sup>th</sup> cycle | 10 <sup>th</sup> cycle | 15 <sup>th</sup> cycle | 1 <sup>st</sup> cycle | 5 <sup>th</sup> cycle | 10 <sup>th</sup> cycle | 15 <sup>th</sup> cycle |
| <i>OCV</i>                           | V                                          | 4.4003                | 4.4009                | 4.3881                 | 4.3521                 | 4.3875                | 4.4156                | 4.4122                 | 4.3918                 |
| <i>R<sub>s</sub></i>                 | Ω cm <sup>2</sup>                          | 2.77321               | 3.046202              | 3.918079               | 4.720776               | 2.907728              | 3.134938              | 3.234187               | 3.552734               |
| <i>R<sub>SEI-anode</sub></i>         | Ω cm <sup>2</sup>                          | 25.03836              | 18.94211              | 13.53541               | 8.848319               | 14.52677              | 15.36214              | 17.45225               | 20.95309               |
| <i>CPE<sub>1</sub> Y<sub>0</sub></i> | Ω <sup>-1</sup> s <sup>n<sub>1</sub></sup> | 4.9328E-06            | 4.5439E-06            | 3.055E-06              | 1.8128E-06             | 2.056E-05             | 5.626E-05             | 1.5304E-05             | 1.5199E-05             |
| <i>CPE<sub>1</sub> n</i>             |                                            | 0.90251               | 0.93845               | 1.0096                 | 1.1                    | 0.8451                | 0.84701               | 0.85958                | 0.85127                |
| <i>R<sub>CEI-cathode</sub></i>       | Ω cm <sup>2</sup>                          | 15.24231              | 28.35948              | 41.68237               | 47.93122               | 24.46299              | 18.20735              | 17.26686               | 15.25023               |
| <i>CPE<sub>2</sub> Y<sub>0</sub></i> | Ω <sup>-1</sup> s <sup>n<sub>2</sub></sup> | 0.00025               | 0.00021488            | 0.00011887             | 0.00011297             | 4.666E-05             | 1.656E-05             | 6.4271E-05             | 8.9333E-05             |
| <i>CPE<sub>2</sub> n</i>             |                                            | 0.7621                | 0.66727               | 0.6668                 | 0.63829                | 0.84834               | 0.85726               | 0.84507                | 0.83376                |
| <i>R<sub>ct</sub></i>                | Ω cm <sup>2</sup>                          | 5.026324              | 5.951782              | 8.126333               | 9.417023               | 7.395077              | 8.320535              | 8.364621               | 7.55062                |
| <i>CPE<sub>3</sub> Y<sub>0</sub></i> | Ω <sup>-1</sup> s <sup>n<sub>3</sub></sup> | 0.0065393             | 0.0073946             | 0.0072711              | 0.0075733              | 0.002397              | 0.0026729             | 0.003171               | 0.0039061              |
| <i>CPE<sub>3</sub> n</i>             |                                            | 0.91512               | 1.0018                | 1.0174                 | 1.0224                 | 0.7543                | 0.72728               | 0.71266                | 0.71909                |
| <i>CPE<sub>4</sub> Y<sub>0</sub></i> | Ω <sup>-1</sup> s <sup>n<sub>4</sub></sup> | 0.48732               | 0.43816               | 0.40611                | 0.33804                | 0.57854               | 0.6428                | 0.67363                | 0.73152                |
| <i>CPE<sub>4</sub> n</i>             |                                            | 0.60604               | 0.60768               | 0.60985                | 0.60786                | 0.61136               | 0.63142               | 0.64332                | 0.6634                 |
| <i>χ<sup>2</sup></i>                 |                                            | 0.0031947             | 0.0031838             | 0.0036525              | 0.025055               | 0.010569              | 0.0092195             | 0.0070283              | 0.0033764              |

### S4. Solution resistance and charge transfer resistance growth

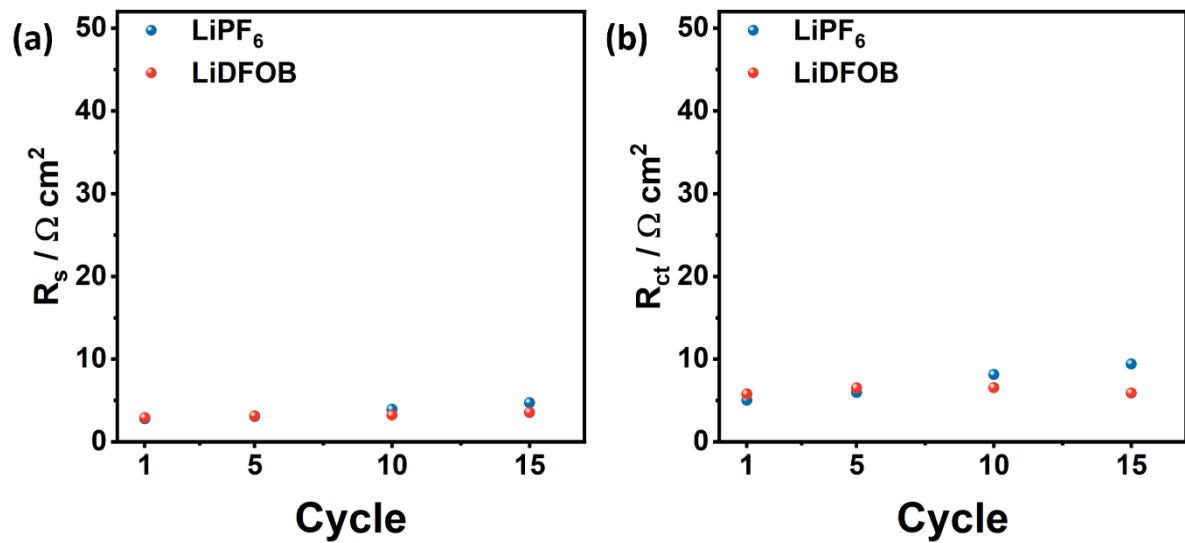

Figure S4. (a) Solution resistance ( $R_s$ ) and (b) Charge transfer resistance ( $R_{ct}$ ) growth of NMC || Cu cell with LiDFOB and LiPF<sub>6</sub> based electrolyte within 15 cycles.
